# Supplementary material for: Source attribution of insoluble light-absorbing particles in seasonal snow across northern China
Source: Copernicus journal article supplement (doi:10.5194/acp-13-6091-2013), 2013-06-27
Supplement: Supplementary file 1 [file acp-13-6091-2013-supplement.pdf]

Supplemental Information for

**Source attribution of light-absorbing aerosol in seasonal snow  
across northern China**

by

Rudong Zhang, Dean A. Hegg, Jianping Huang, and Qiang Fu

([deanhegg@atmos.washington.edu](mailto:deanhegg@atmos.washington.edu))

This SI is 3 pages long, including the cover page, and contains four figures.

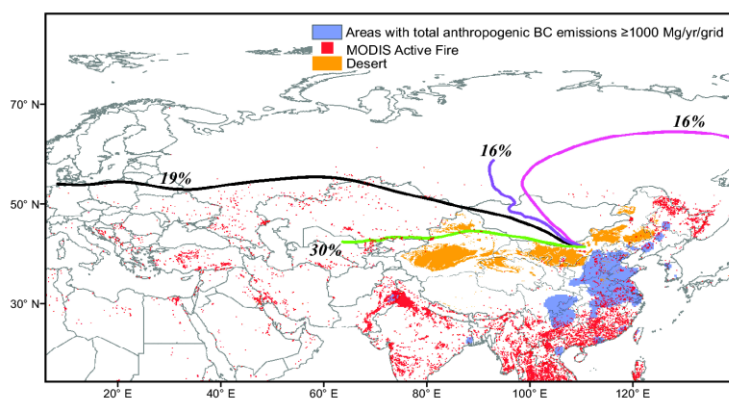

Figure S1. Back trajectory analysis for region 1 discussed in the text. A 7 cluster analysis back trajectory was done on each of the regions with mean trajectories shown for each cluster that encompassed 10% or more of the back trajectories. 296 total trajectories were included in the analysis.

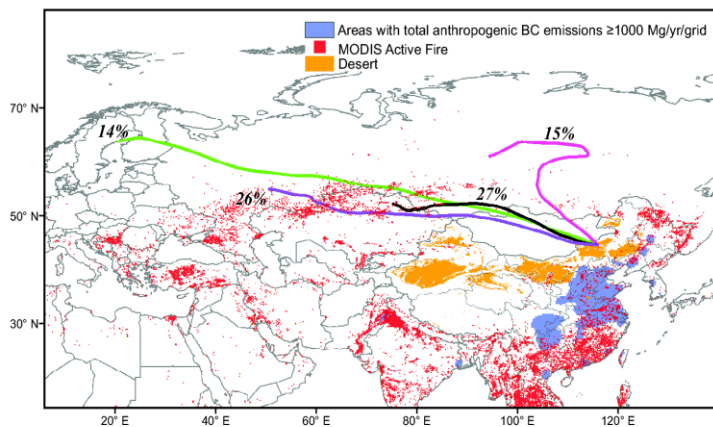

Figure S2. Back trajectory analysis for region 2 discussed in the text. A 7 cluster analysis back trajectory was done on each of the regions with mean trajectories shown for each cluster that encompassed 10% or more of the back trajectories. 380 total trajectories were included in the analysis.

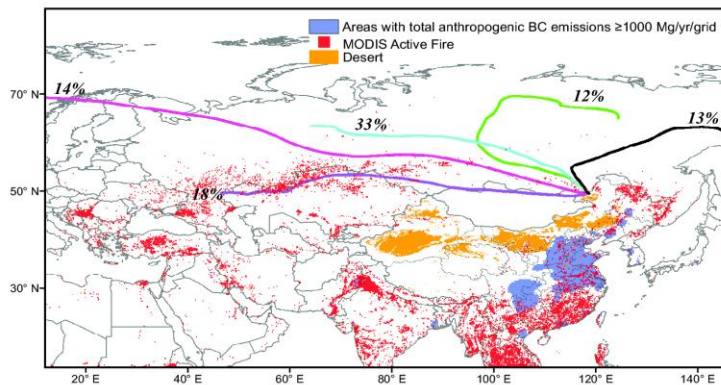

Figure S3. Back trajectory analysis for region 3 discussed in the text. A 7 cluster analysis back trajectory was done on each of the regions with mean trajectories shown for each cluster that encompassed 10% or more of the back trajectories. 396 total trajectories were included in the analysis.

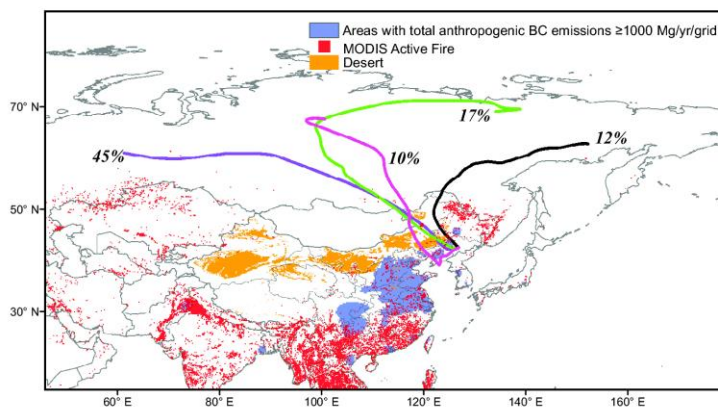

Figure S4. Back trajectory analysis for region 6 discussed in the text. A 7 cluster analysis back trajectory was done on each of the regions with mean trajectories shown for each cluster that encompassed 10% or more of the back trajectories. 400 total trajectories were included in the analysis.
